# Supplementary material
Source: PubMed Central journal article supplement (PMC7747457)
Supplement: 40820_2017_184_MOESM1_ESM.pdf [file 40820_2017_184_MOESM1_ESM.pdf]

Supporting Information for

## **Upconversion Nanoparticles Encoded Hydrogel Microbeads-Based Multiplexed Protein Detection**

Swati Shikha<sup>1</sup>, Xiang Zheng<sup>1,2</sup>, Yong Zhang<sup>1,2,\*</sup>

<sup>1</sup>Department of Biomedical Engineering, Faculty of Engineering, 4 Engineering Drive 3, Block E4 #04-08, National University of Singapore (NUS), Singapore 117583

<sup>2</sup>NUS Graduate School for Integrative Sciences and Engineering, Centre for Life Sciences (CeLS), 05-01 28 Medical Drive, Singapore 117456

\*Corresponding author. E-mail: biezy@nus.edu.sg

## Figures

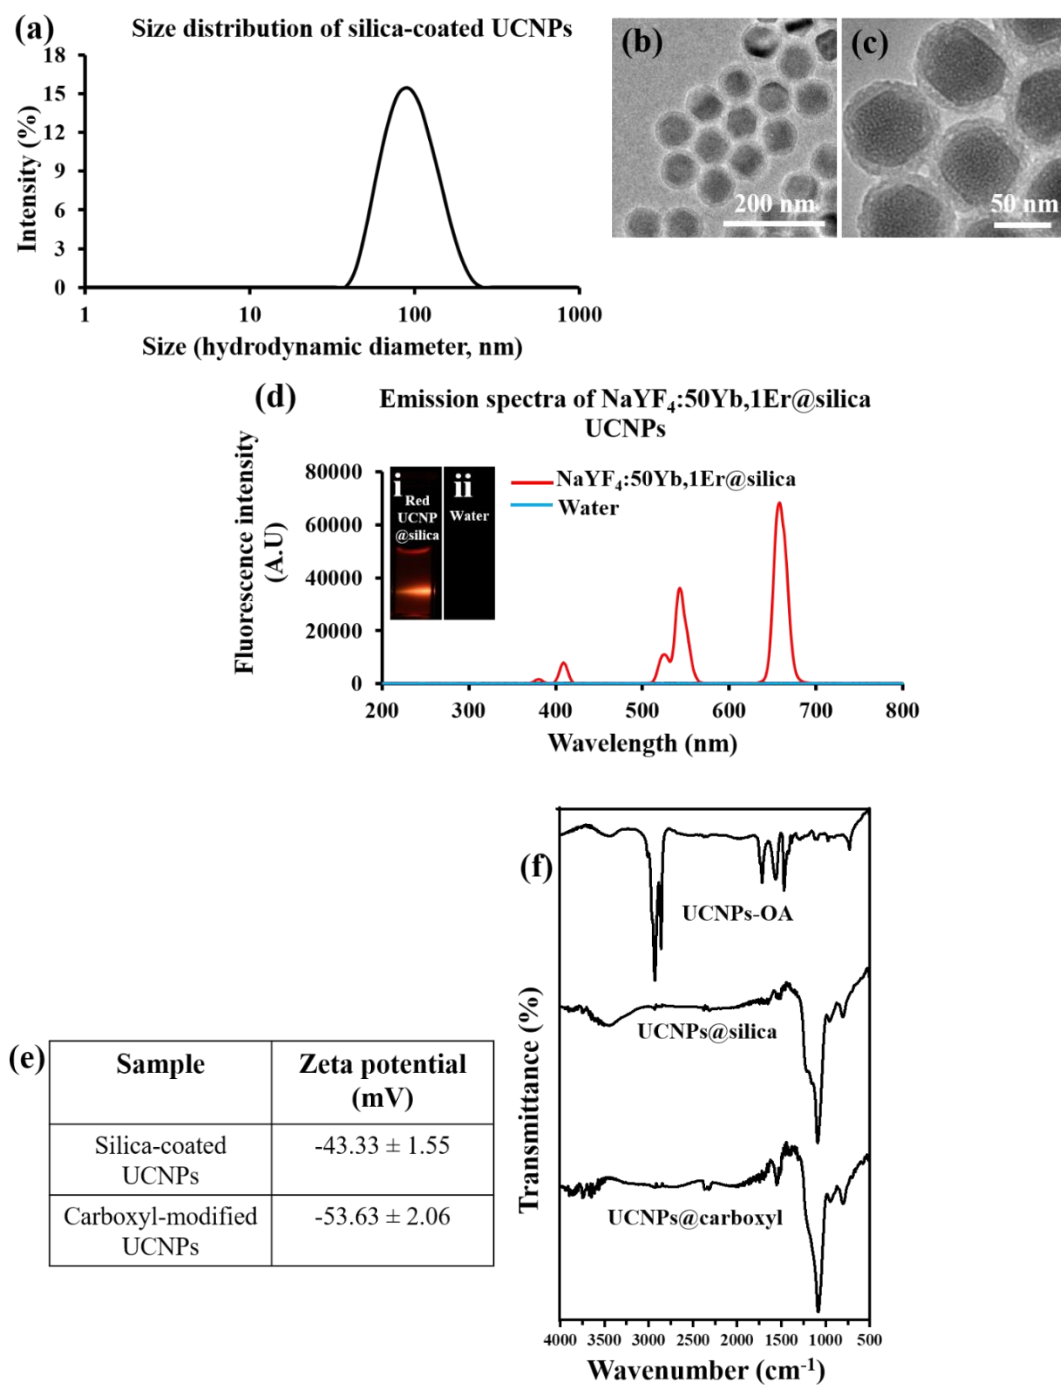

**Fig. S1** Surface modification of UCNPs **a** DLS size distribution, **b, c** TEM images at different magnifications, and **d** fluorescence emission spectra of silica coated UCNPs. **e** Zeta potential of silica-coated and carboxyl-modified UCNPs. **f** FTIR spectra of UCNPs before and after surface modification

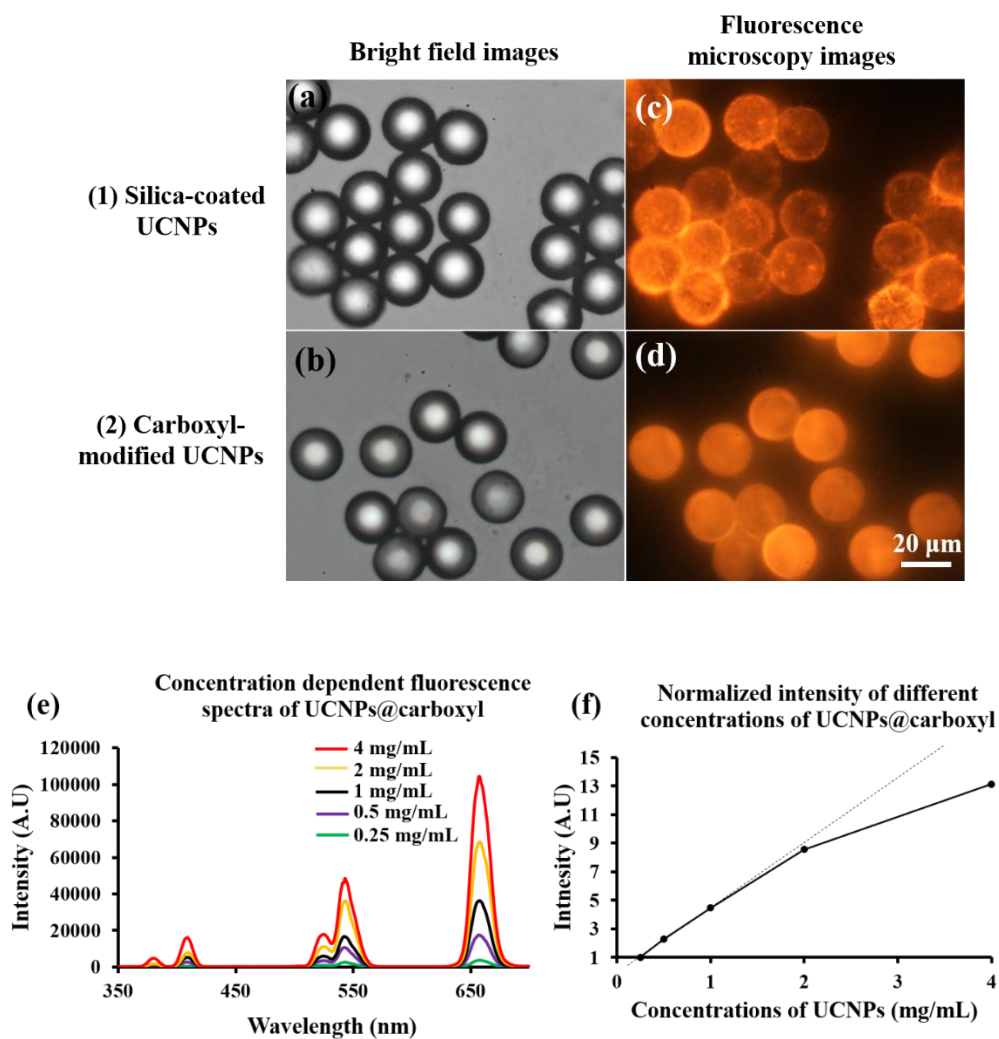

**Fig. S2** Single color UCNP encoded microbeads synthesis. **a, b** Bright field and **c, d** corresponding fluorescence microscopy images of microbeads encoded with silica-coated (Panel 1), and carboxyl-modified NaYF<sub>4</sub>:50%Yb1%Er UCNP (Panel 2). **e** Relationship between fluorescence intensity and concentration of carboxyl-modified NaYF<sub>4</sub>:50%Yb1%Er UCNP in water upon excitation under 980 nm NIR laser, and **f** their corresponding normalized fluorescence intensity

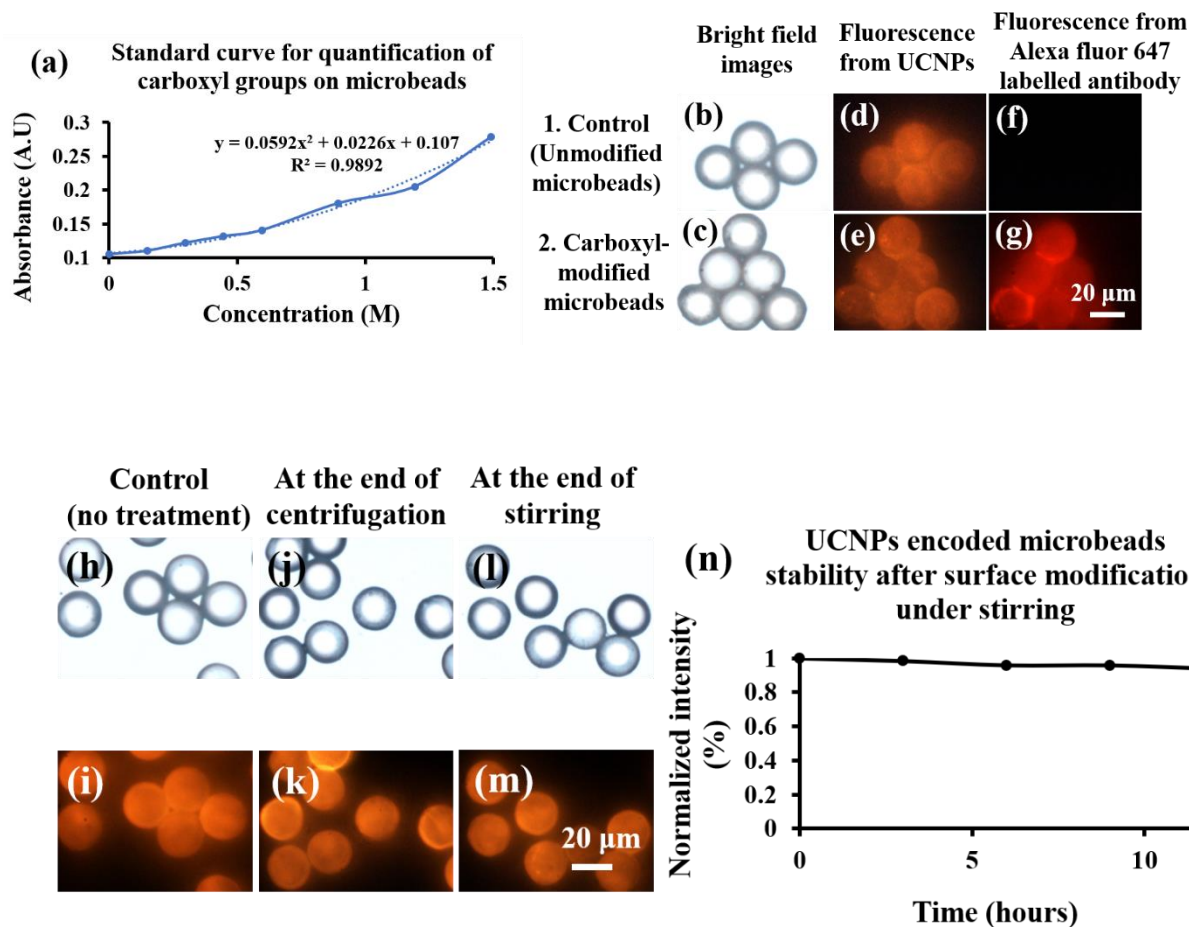

**Fig. S3** Surface modification of UCNPs encoded microbeads. **a** Standard curve for BCG assay to quantify carboxyl groups on the microbeads surface (absorbance taken at 562 nm) **b, c** Bright-field and **d, e** corresponding fluorescence microscopy images showing UCNPs encapsulated inside the microbeads and **f, g** Alexa Fluor 647 labelled antibody to check the functionality of surface modified UCNPs encoded microbeads (at 40x magnification). Physical stability of surface modified UCNPs encoded microbeads. Bright-field and fluorescence microscopy images of **h, i** original microbeads without any treatment, **j, k** after subjecting to centrifugation, and **l, m** at the end of stirring experiments. **n** Normalized intensity of microbeads at different time points of stirring in accordance to assay conditions (n = 20 microbeads)

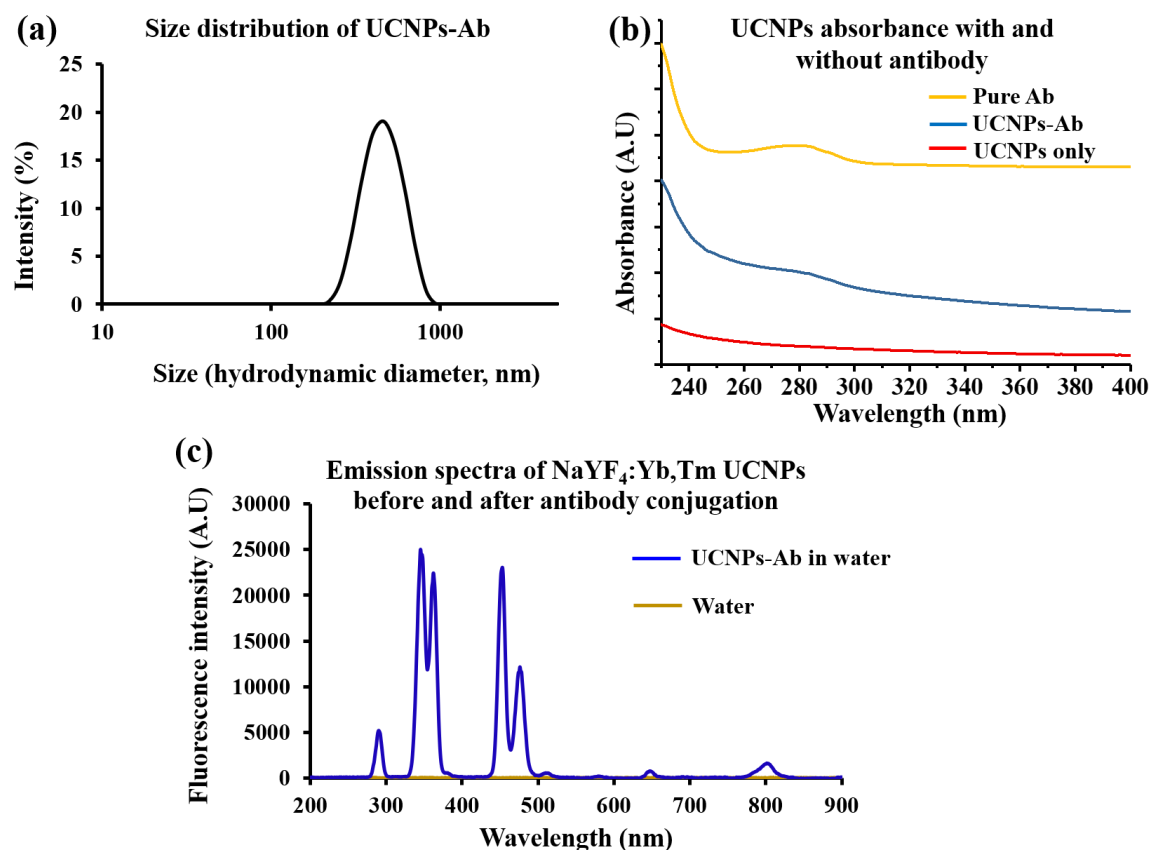

**Fig. S4** Reporter antibody conjugated NaYF<sub>4</sub>:30%Yb0.5%Tm UCNP. **a** DLS showing average hydrodynamic diameter of NaYF<sub>4</sub>:30%Yb0.5%Tm UCNP conjugated to reporter antibody. **b** Absorbance spectrum of UCNP, pure antibody and UCNP conjugated antibody. **c** Emission fluorescence spectra of NaYF<sub>4</sub>:30%Yb0.5%Tm UCNP conjugated to reporter antibody in water and control (water only), under NIR laser excitation at 980 nm

## Reference

- [1] C. Yesildag, A. Tyushina, M. Lensen, Nano-contact transfer with gold nanoparticles on PEG hydrogels and using wrinkled PDMS-stamps. *Polymers* **9**(6), 199 (2017). <https://doi.org/10.3390/polym9060199>
